# Supplementary material
Source: Springer Nature journal article supplement (https://www.springermedizin.de/resource/supplementary/12911_2011_492_MOESM4_ESM.pdf/9525958)
Supplement: MOESM4 [file 9525958]

**Age structure of the general population of Rhône-Alpes (France)**

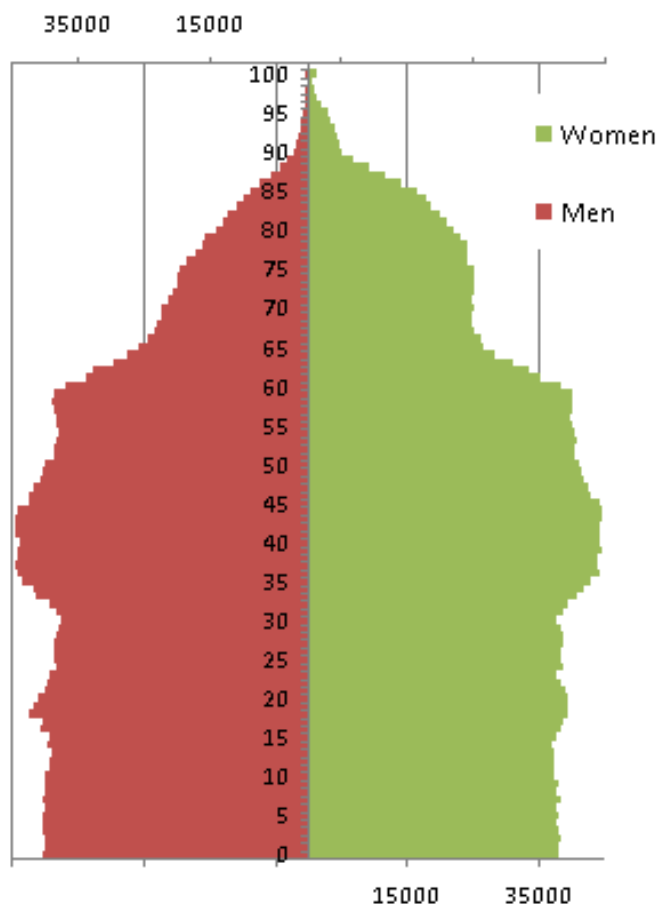

Source : INSEE Census 2008

**Age structure of patients with an electronic health record registered in the SISRA platform**

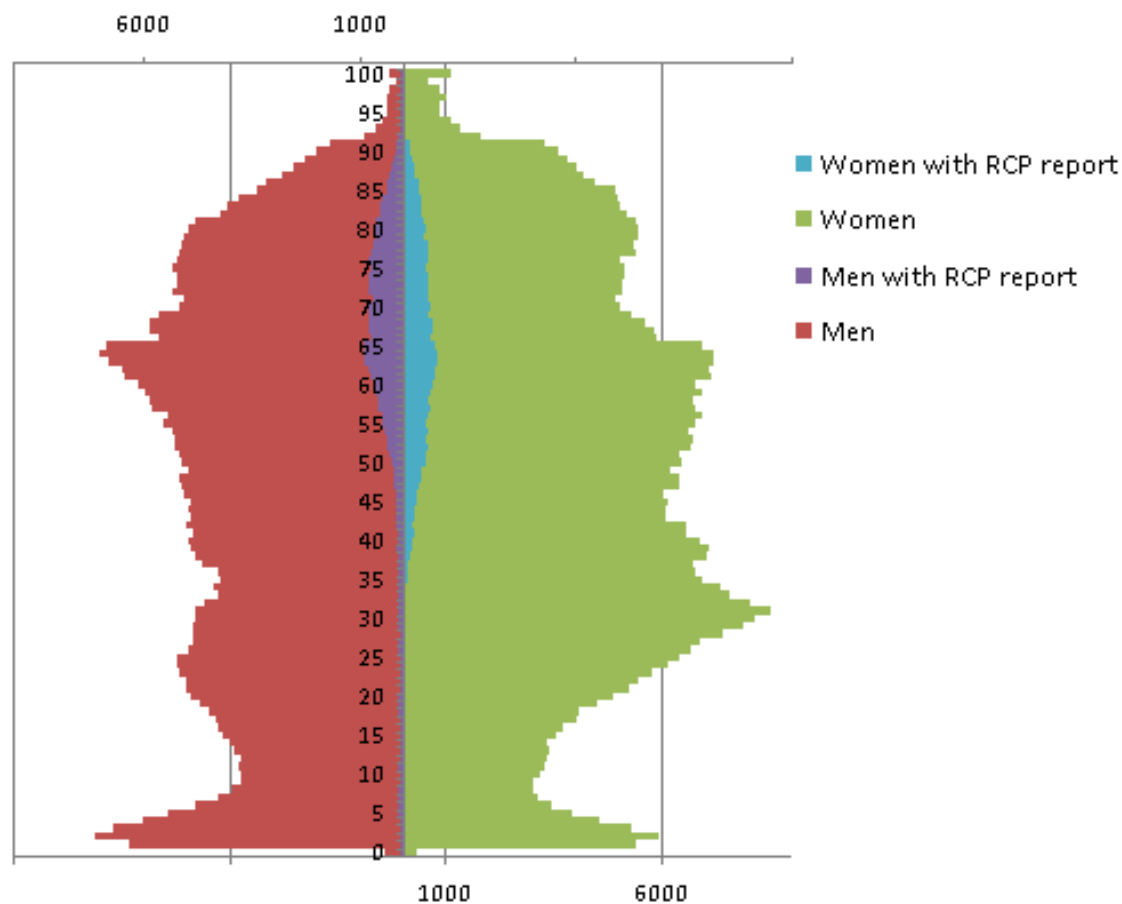

RCP : multidisciplinary oncology meetings  
Source : GCS SISRA - February 2011
